# Supplementary material for: Fabrication of yeast β-glucan/sodium alginate/γ-polyglutamic acid composite particles for hemostasis and wound healing
Source: Royal Society of Chemistry journal article supplement (doi:10.1039/d3bm02068a), 2024-01-01
Supplement: d3bm02068a1.pdf [file d3bm02068a1.pdf]

## Supplementary Material

### Fabrication of yeast $\beta$ -glucan/sodium alginate/ $\gamma$ -polyglutamic acid composite particles for hemostasis and wound healing

Qinglin Zou<sup>a</sup>, Hongdong Duan<sup>b</sup>, Shimin Fang<sup>c</sup>, Wenlong Sheng<sup>a</sup>, Xiaobin Li<sup>a</sup>, Rostyslav Stoika<sup>d</sup>,  
Nataliya Finiuk<sup>d</sup>, Rostyslav Panchuk<sup>d</sup>, Kechun Liu<sup>a,\*</sup>, Lizhen Wang<sup>a,\*</sup>

<sup>a</sup>*Biology Institute, Qilu University of Technology (Shandong Academy of Sciences), Jinan 250103, China*

<sup>b</sup>*School of Chemistry and Chemical Engineering, Qilu University of Technology (Shandong Academy of Sciences), Jinan 250353, China*

<sup>c</sup>*School of Pharmaceutical sciences, Qilu University of Technology (Shandong Academy of Sciences), Jinan 250353, China*

<sup>d</sup>*Department of Regulation of Cell Proliferation and Apoptosis, Institute of Cell Biology, National Academy of Sciences of Ukraine, Lviv, Ukraine*

\*Corresponding author: Kechun Liu, [liukechun2000@163.com](mailto:liukechun2000@163.com); Lizhen Wang, e-mail: [wlyzh1106@126.com](mailto:wlyzh1106@126.com)

### Experimental

#### *Antibacterial experiments*

Antibacterial activities of APGG particles against *S. aureus* (25923, ATCC) and *E. coli* (25922, ATCC) were investigated in solid LB agar plates. The tested samples were sterilized for 2 h under a UV lamp and dissolved in LB medium to afford different concentrations of solutions (1, 0.1, and 0.01 mg/mL). The solutions were mixed with bacterial suspensions and diluted. The bacterial suspensions (100  $\mu$ L,  $1 \times 10^5$  CFUs) were uniformly coated on the LB agar plates, and incubated at 37 °C overnight. The photos of the agar plates were taken with a camera. The bacterial colonies were counted and the bacterial survival ratio was calculated using the following equation:

$$\text{Bacterial survival ratio} = \frac{N_e}{N_c} \times 100\%$$

Where  $N_e$  and  $N_c$  indicate the bacterial colonies of experimental group and control group,

respectively.

## Results

### *Antibacterial activity*

The antibacterial activity of APGG particles against *S. aureus* and *E. coli* was investigated by the flat-coating method. As depicted in Fig. S1A, APGG particles showed no obvious antibacterial activities against *S. aureus* and *E. coli*. The Bacterial survival ratio showed no obvious decrease (Fig. S1B). These results might be caused by the fact that all the starting materials including CMG, SA, and  $\gamma$ -PGA showed no or moderate antibacterial effects *in vitro*.

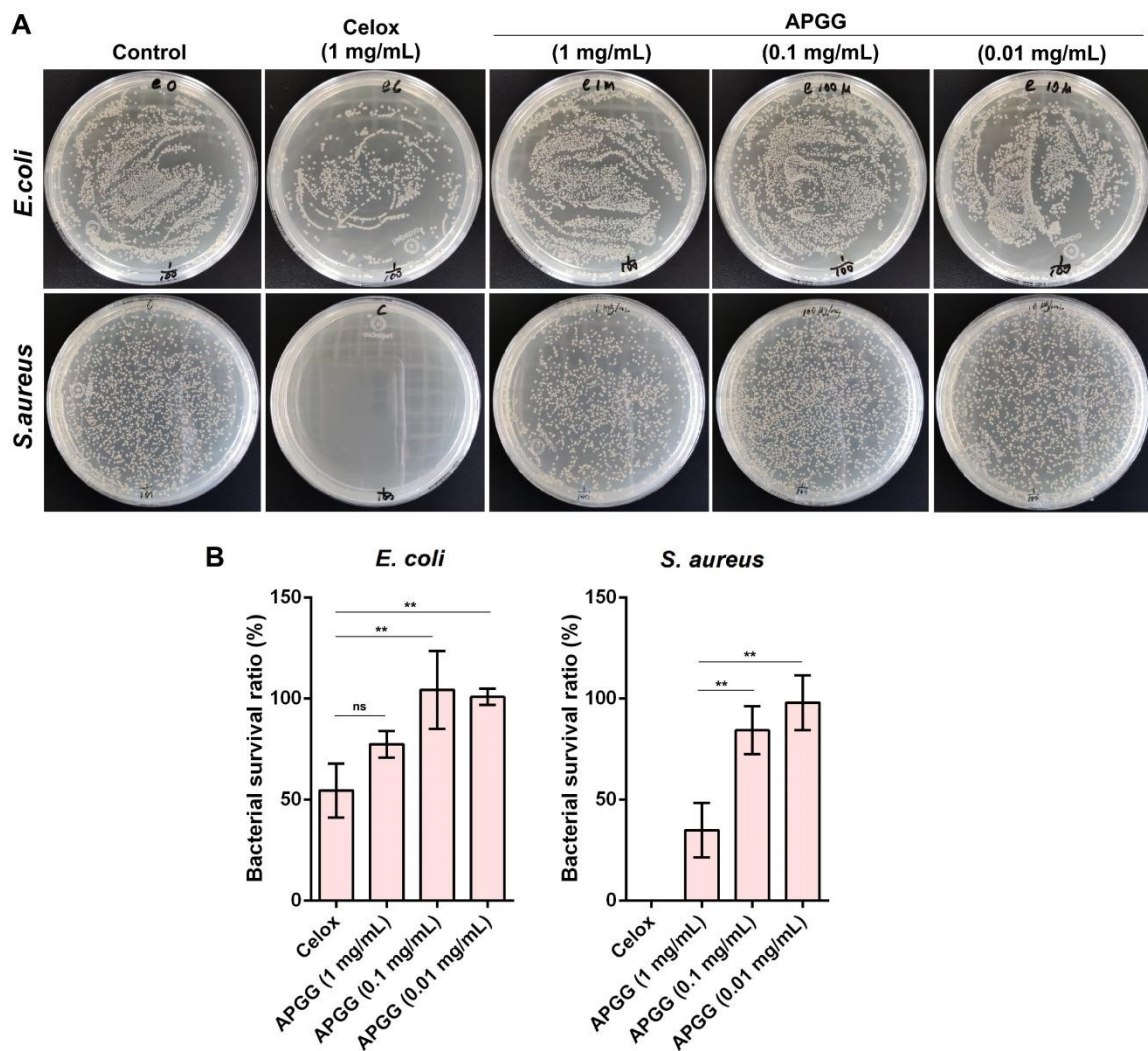

**Fig. S1.** (A) Antibacterial activity of APGG particles (APGG0.5) and Celox against *S. aureus* and *E. coli* analyzed on agar plates. (B) Bacterial survival ratio after treatment with APGG particles and Celox for 4 h. Data are presented as mean  $\pm$  SD. \*\* $p < 0.01$ .

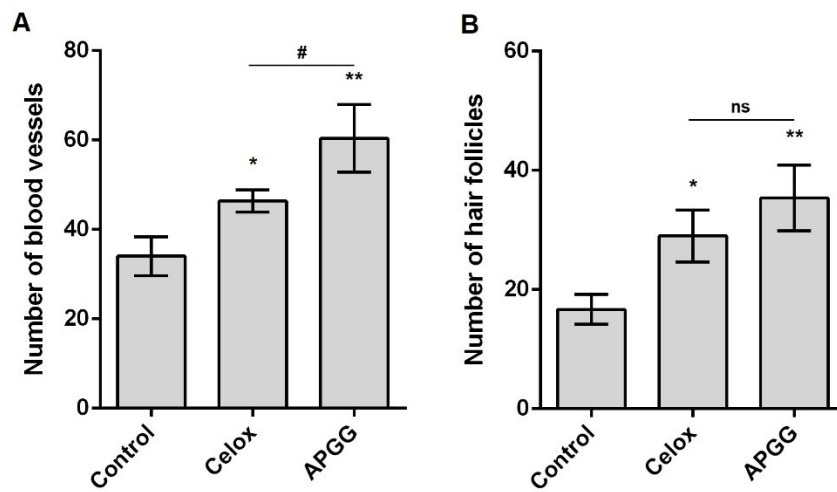

**Fig. S2.** (A) Number of blood vessels on the wound sites at day 7. (B) Number of hair follicles on the wound sites at day 14. Data are presented as mean  $\pm$  SD. \*\* $p < 0.05$  and \*\*\* $p < 0.01$  vs Control, # $p < 0.05$  vs Celox.

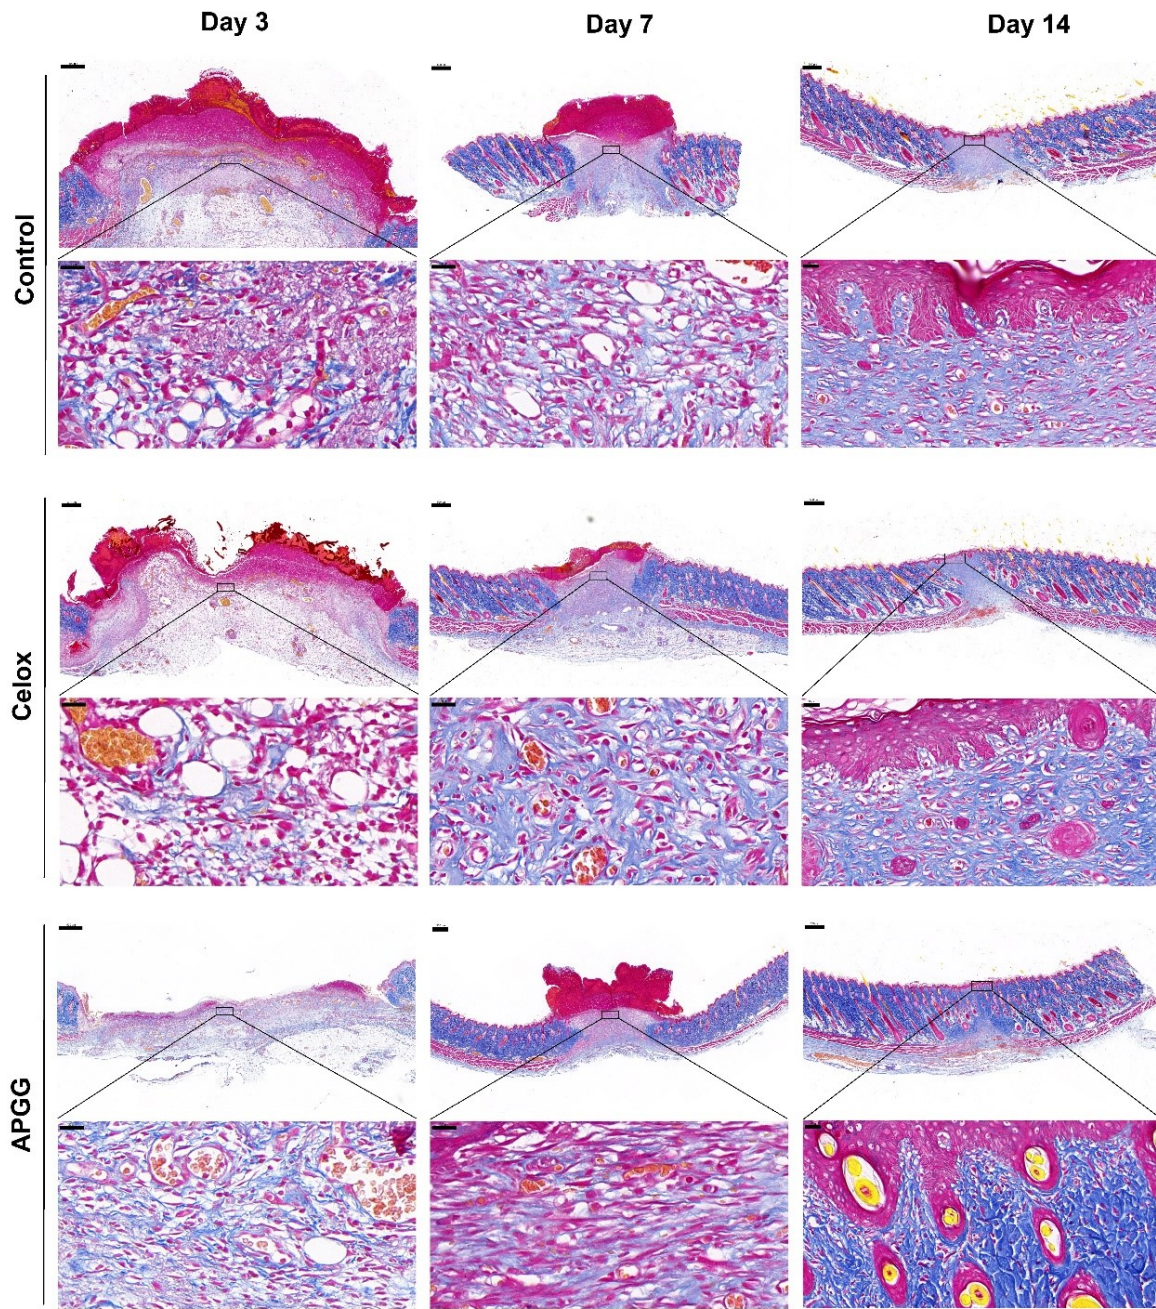

**Fig. S3.** Masson's trichrome staining of wound tissues at day 3, 7 and 14,  $n = 3$  per group. Scale bar is 500  $\mu\text{m}$  for the original pictures, scale bar is 20  $\mu\text{m}$  for the enlarged pictures.

**Table S1.** Hemostasis time of APGG and Celox in a liver rupture bleeding model.

| <b>Samples</b>                | <b>APGG</b>  | <b>Celox</b> |
|-------------------------------|--------------|--------------|
| Approximately hemostatic time | < 20 seconds | > 30 seconds |
